# Supplementary material
Source: publisher site journal article supplement (http://kjim.org/upload/media/kjim-2020-629-suppl3.pdf)
Supplement: Supplementary file 1 [file kjim-2020-629-suppl3.pdf]

**Supplementary Table 3. Baseline characteristics of participants among tertiles of changes in central fatness**

| Characteristic          | Loss (Tertile 1) | Stable (Tertile 2) | Gain (Tertile 3) | <i>p</i> value <sup>a</sup> |
|-------------------------|------------------|--------------------|------------------|-----------------------------|
| From changes in WC      |                  |                    |                  |                             |
| Age, yr                 | 67.1 ± 6.0       | 66.4 ± 5.4         | 66.4 ± 5.6       | 0.02                        |
| BMI, kg/m <sup>2</sup>  | 22.7 ± 3.3       | 22.8 ± 3.2         | 22.4 ± 3.0       | 0.13                        |
| Blood pressure          |                  |                    |                  |                             |
| SBP, mmHg               | 134.2 ± 22.1     | 132.6 ± 21.5       | 132.1 ± 21.5     | 0.22                        |
| DBP, mmHg               | 74.4 ± 11.4      | 73.9 ± 11.4        | 74.3 ± 11.4      | 0.68                        |
| Biomarkers              |                  |                    |                  |                             |
| FPG, mg/dL <sup>b</sup> | 101.0 ± 11.8     | 100.9 ± 10.2       | 100.4 ± 10.4     | 0.59                        |
| HbA1c, %                | 5.1 ± 0.40       | 5.1 ± 0.4          | 5.1 ± 0.4        | 0.93                        |
| TC, mg/dL               | 194.2 ± 40.0     | 193.9 ± 37.6       | 191.8 ± 35.7     | 0.50                        |
| TG, mg/dL               | 116.9 ± 68.2     | 121.1 ± 73.1       | 117.6 ± 68.2     | 0.52                        |
| HDL-C, mg/dL            | 53.6 ± 16.3      | 51.6 ± 14.4        | 52.2 ± 14.6      | 0.07                        |
| LDL-C, mg/dL            | 117.9 ± 36.9     | 118.6 ± 34.2       | 117.7 ± 32.0     | 0.87                        |
| UA, mg/dL               | 4.6 ± 1.3        | 4.6 ± 1.2          | 4.4 ± 1.2        | 0.01                        |
| WBC, 10 <sup>9</sup> /L | 6.3 ± 2.0        | 6.2 ± 1.8          | 6.2 ± 1.9        | 0.68                        |
| lnCRP, mg/L             | 0.3 ± 1.1        | 0.2 ± 1.0          | 0.1 ± 1.0        | 0.06                        |
| From changes in WHtR    |                  |                    |                  |                             |
| Age, yr                 | 66.9 ± 5.8       | 66.4 ± 5.4         | 66.5 ± 5.7       | 0.23                        |
| BMI, kg/m <sup>2</sup>  | 22.7 ± 3.3       | 22.8 ± 3.2         | 22.4 ± 2.9       | 0.05                        |
| Blood pressure          |                  |                    |                  |                             |
| SBP, mmHg               | 133.0 ± 21.3     | 133.6 ± 22.3       | 132.4 ± 21.4     | 0.65                        |
| DBP, mmHg               | 74.2 ± 11.2      | 74.2 ± 11.6        | 74.3 ± 11.2      | 0.99                        |
| Biomarkers              |                  |                    |                  |                             |
| FPG, mg/dL <sup>b</sup> | 101.1 ± 11.8     | 100.5 ± 10.2       | 100.7 ± 10.3     | 0.62                        |
| HbA1c, %                | 5.1 ± 0.4        | 5.1 ± 0.4          | 5.1 ± 0.4        | 0.30                        |
| TC, mg/dL               | 194.3 ± 40.1     | 195.3 ± 37.9       | 190.5 ± 35.2     | 0.07                        |
| TG, mg/dL               | 117.8 ± 69.3     | 120.0 ± 72.9       | 118.1 ± 67.5     | 0.84                        |
| HDL-C, mg/dL            | 53.4 ± 16.1      | 52.2 ± 14.8        | 51.8 ± 14.5      | 0.17                        |
| LDL-C, mg/dL            | 117.8 ± 36.4     | 120.0 ± 35.5       | 116.4 ± 31.1     | 0.18                        |
| UA, mg/dL               | 4.6 ± 1.3        | 4.6 ± 1.2          | 4.4 ± 1.2        | 0.01                        |
| WBC, 10 <sup>9</sup> /L | 6.3 ± 2.0        | 6.2 ± 1.8          | 6.2 ± 1.9        | 0.63                        |
| lnCRP, mg/L             | 0.2 ± 1.1        | 0.2 ± 1.0          | 0.1 ± 1.0        | 0.11                        |
| From changes in BRI     |                  |                    |                  |                             |
| Age, yr                 | 67.0 ± 5.8       | 66.4 ± 5.4         | 66.5 ± 5.7       | 0.18                        |
| BMI, kg/m <sup>2</sup>  | 22.7 ± 3.3       | 22.5 ± 3.2         | 22.6 ± 3.0       | 0.49                        |
| Blood pressure          |                  |                    |                  |                             |
| SBP, mmHg               | 133.1 ± 21.2     | 133.2 ± 22.4       | 132.8 ± 21.4     | 0.94                        |
| DBP, mmHg               | 74.3 ± 11.2      | 74.0 ± 11.6        | 74.4 ± 11.3      | 0.88                        |
| Biomarkers              |                  |                    |                  |                             |
| FPG, mg/dL <sup>b</sup> | 101.3 ± 11.8     | 100.4 ± 10.3       | 100.6 ± 10.3     | 0.39                        |
| HbA1c, %                | 5.1 ± 0.4        | 5.1 ± 0.4          | 5.1 ± 0.4        | 0.31                        |
| TC, mg/dL               | 194.4 ± 40.0     | 193.8 ± 38.1       | 191.7 ± 35.1     | 0.43                        |

**Supplementary Table 3. Continued**

| Characteristic          | Loss (Tertile 1) | Stable (Tertile 2) | Gain (Tertile 3) | <i>p</i> value <sup>a</sup> |
|-------------------------|------------------|--------------------|------------------|-----------------------------|
| TG, mg/dL               | 118.5 ± 69.4     | 117.8 ± 72.5       | 119.6 ± 67.9     | 0.90                        |
| HDL-C, mg/dL            | 53.2 ± 16.1      | 52.5 ± 14.7        | 51.7 ± 14.6      | 0.19                        |
| LDL-C, mg/dL            | 117.9 ± 36.5     | 118.8 ± 35.5       | 117.5 ± 31.2     | 0.80                        |
| UA, mg/dL               | 4.6 ± 1.3        | 4.6 ± 1.2          | 4.4 ± 1.2        | 0.01                        |
| WBC, 10 <sup>9</sup> /L | 6.3 ± 2.1        | 6.2 ± 1.8          | 6.2 ± 1.9        | 0.45                        |
| lnCRP, mg/L             | 0.2 ± 1.1        | 0.2 ± 1.0          | 0.1 ± 1.0        | 0.17                        |

Values are presented as mean ± standard deviation.

WC, waist circumference; BMI, body mass index; SBP, systolic blood pressure; DBP, diastolic blood pressure; FPG, fasting plasma glucose; HbA1c, hemoglobin A1c; TC, total cholesterol; TG, triglyceride; HDL-C, high-density lipoprotein cholesterol; LDL-C, low-density lipoprotein cholesterol; UA, uric acid; WBC, white blood cell; CRP, C-reactive protein; WHtR, waist-height ratio; BRI, body roundness index

<sup>a</sup>It was compared using one-way analysis of variance.

<sup>b</sup>A total of 1,630 participants provided fasting blood samples.
